# Supplementary material
Source: PubMed Central journal article supplement (PMC2686178)
Supplement: blood-2009-02-202937_1.pdf [file blood-2009-02-202937_1.pdf]

| <b>Risk Category/Disease and Stage*</b>         | <b>MMF<br/>(n = 74)</b>          | <b>Placebo<br/>(n = 77)</b> |
|-------------------------------------------------|----------------------------------|-----------------------------|
| <b>Low risk of recurrent disease, n (%)</b>     | <b>50 [8,4]<sup>†</sup> (68)</b> | <b>52 [3,3] (68)</b>        |
| Sickle cell disease                             | 0 [0,0] (0)                      | 1 [0,0] (1)                 |
| Myeloproliferative disorders or myelofibrosis   | 4 [2,0] (5)                      | 3 [0,0] (4)                 |
| Chronic myeloid leukemia in chronic phase       | 3 [0,1] (4)                      | 2 [0,0] (3)                 |
| Refractory anemia                               | 5 [0,0] (7)                      | 3 [0,0] (4)                 |
| Chronic lymphocytic leukemia                    | 4 [1,0] (5)                      | 3 [0,0] (4)                 |
| Acute leukemia                                  | 29 [3,3] (39)                    | 26 [1,3] (34)               |
| Lymphoma                                        | 2 [1,0] (3)                      | 8 [1,0] (10)                |
| Myeloma                                         | 3 [1,0] (4)                      | 6 [1,0] (8)                 |
| <b>High risk of recurrent malignancy, n (%)</b> | <b>24 [9,4] (32)</b>             | <b>25 [7,2] (32)</b>        |
| Chronic myeloid leukemia in accelerated phase   | 2 [0,1] (3)                      | 1 [0,0] (1)                 |
| Chronic myelomonocytic leukemia                 | 1 [1,0] (1)                      | 1 [1,0] (1)                 |
| Refractory anemia with excess blasts            | 10 [5,1] (14)                    | 9 [3,0] (12)                |
| Acute leukemia                                  | 11 [3,2] (15)                    | 12 [3,2] (16)               |
| Lymphoma                                        | 0 (0)                            | 2 [0,0] (3)                 |

\* Categories correspond with low and standard risk of recurrent malignancy versus high risk of recurrent malignancy, as defined by Kahl et al.<sup>32</sup>

<sup>†</sup> [x,x] = [no. of relapses, no. of non-relapse deaths]
