# Supplementary material
Source: PubMed Central journal article supplement (PMC2686178)
Supplement: blood-2009-02-202937_2.pdf [file blood-2009-02-202937_2.pdf]

| Time window* | Overall mortality             |          | Recurrent malignancy          |          |
|--------------|-------------------------------|----------|-------------------------------|----------|
|              | HR (95% confidence interval)* | <i>P</i> | HR (95% confidence interval)* | <i>P</i> |
| 90 days      | 0.88 (0.4 – 1.9)              | .76      | 1.92 (0.9 – 4.3)              | .11      |
| 180 days     | 1.23 (0.7 – 2.6)              | .60      | 1.74 (0.8 – 3.9)              | .18      |
| 1 year       | 1.68 (0.8 – 3.6)              | .19      | 1.55 (0.7 – 3.4)              | .28      |
| 2 years      | 2.25 (1.0 – 5.1)              | .05      | 1.55 (0.7 – 3.4)              | .28      |
| Ever         | 2.22 (1.0 – 5.1)              | .06      | 1.53 (0.7 – 3.4)              | .30      |

\* Since the duration or time window of possible MMF effect on risks of overall mortality or recurrent malignancy is not known, the analysis was carried out under a variety of assumptions. The analysis was stratified on the number of sites affected by chronic GVHD at onset (1 vs. >1) and the type of pre-transplant conditioning regimen (myeloablative vs. non-myeloablative).
